# Supplementary material for: Regulatory mechanisms and clinical applications of tumor-driven exosomal circRNAs in cancers
Source: PubMed Central journal article supplement (PMC10198146; doi:10.7150/ijms.82419), 2023-05-08
Supplement: ijmsv20p0818s1.pdf [file ijmsv20p0818s1.pdf]

Supplementary Table1 Basic informations of tumor-driven exosomal circRNAs in cancers

|                             | Exosomal circRNA                                   | Source of exosome                           | Receive cell                      | Expression    | Ref           |    |
|-----------------------------|----------------------------------------------------|---------------------------------------------|-----------------------------------|---------------|---------------|----|
| Digestive system malignancy |                                                    |                                             |                                   |               |               |    |
| Liver cancer                | hsa_circ_0004277                                   | Serum of Patients,HepG2,SMMC-7721           | HL-7702                           | Upregulated   | 17            |    |
|                             | circTMEM45A                                        | Serum of Patients                           | —                                 | Upregulated   | 18            |    |
|                             | circUHRF1                                          | Serum of Patients,HCCLM3,SMMC-7721          | NK                                | Upregulated   | 19            |    |
|                             | hsa_circ_0004658                                   | THP-1 Mφ                                    | SMMC-7721,HepG2                   | Upregulated   | 20            |    |
|                             | hsa_circ_0025129                                   | Serum of Patients,3T3L1                     | HepG2                             | Upregulated   | 21            |    |
|                             | circRNA-SORE                                       | Drug resistant HCC cells-derived Exosomes   | parental HCC cell                 | Upregulated   | 22            |    |
|                             | circPTGR1                                          | Serum of Patients,HCCLM3                    | HepG2,97L                         | Upregulated   | 23            |    |
|                             | hsa_circ_0004001,hsa_circ_0004123,hsa_circ_0075792 | Serum of Patients                           | —                                 | Upregulated   | 24            |    |
|                             | circRNA Cdr1                                       | Serum of Patients,HepG2,SMMC-7721           | 293T                              | Upregulated   | 25            |    |
|                             | circ-G004213                                       | Serum of Patients                           | —                                 | Upregulated   | 26            |    |
|                             | circTMEM181                                        | Serum of Patients                           | tumor-infiltrating immune cells   | Downregulated | 27            |    |
|                             |                                                    | Huh-7 overexpressing circTMEM181            |                                   |               |               |    |
|                             | circ-0072088                                       | Serum of Patients,Huh-7                     | Hep3B                             | Upregulated   | 28            |    |
|                             | circFBLIM1                                         | Serum of Patients                           | —                                 | Upregulated   | 29            |    |
|                             | circRNA-100338                                     | Serum of Patients,Hep3B,MHCC97H             | HUVEC                             | Upregulated   | 30            |    |
|                             | circANTXR1                                         | Serum of Patients,Huh-7                     | HCCLM3                            | Upregulated   | 31            |    |
|                             | circ_0006602                                       | Serum of Patients                           | —                                 | Upregulated   | 32            |    |
|                             | circRNA_100284                                     | Serum of Patients,Arsenite-transformed L-02 | No-transformed L-02               | Upregulated   | 33            |    |
|                             | circ_0051443                                       | Serum of Patients,HL-7702                   | Hep3b,HuH7                        | Downregulated | 34            |    |
|                             | Colon cancer                                       | circLPAR1                                   | Serum of Patients,FHC,HCT116,DLD1 | HCT116,DLD1   | Upregulated   | 35 |
|                             |                                                    | circ-ABCC1                                  | Serum of Patients,CD133+Caco2     | Caco2,HCT15   | Upregulated   | 36 |
|                             |                                                    | circ_0006174                                | DOX-LoVo,DOX-HCT116               | LoVo,HCT116   | Upregulated   | 37 |
|                             |                                                    | circFNDC3B                                  | Serum of Patients,LoVo,SW480      | LoVo,SW480    | Downregulated | 38 |
|                             |                                                    | circ-133                                    | Serum of Patients                 | HCT116,SW480  | Upregulated   | 39 |
|                             |                                                    | hypoxic-HCT116,hypoxic-SW480                |                                   |               |               |    |
| circ-PNN                    |                                                    | Serum of Patients                           | —                                 | Upregulated   | 40            |    |
| ciRS-122                    |                                                    | Serum of Patients,SW480,SW480/L-OHP         | SW480                             | Upregulated   | 41            |    |
| circPACRGL                  |                                                    | HCT116,SW480                                | HCT116,SW480                      | Upregulated   | 42            |    |
| hsa-circ-0004771            |                                                    | Serum of Patients                           | —                                 | Upregulated   | 43            |    |
| circFMN2                    |                                                    | Serum of Patients                           | —                                 | Upregulated   | 44            |    |

|                              |                  |                                   |                  |               |    |
|------------------------------|------------------|-----------------------------------|------------------|---------------|----|
|                              | circ_IFT80       | Serum of Patients                 | SW480,SW620      | Upregulated   | 45 |
|                              | circ-RNF121      | HCT-116,SW480                     | —                | Upregulated   | 46 |
|                              | circEPB41L2      | Serum of Patients,FHC,SW480,SW620 | SW480,SW620      | Downregulated | 47 |
|                              | circ_0000338     | HCT116-R                          | HCT116-P         | Upregulated   | 48 |
|                              | circLONP2        | HCT116-HM                         | HCT116           | Upregulated   | 49 |
|                              | circCOG2         | HCT8-HM,SW480-HM                  | HCT8-LM,SW480-LM | Upregulated   | 50 |
|                              | circRNAs         | DLD-1,DKO-1,DKs-8                 | —                | —             | 51 |
|                              | circRHOBTB3      | Serum of Patients                 | —                | Downregulated | 52 |
|                              | circ_0007334     | FHC,HCT-116,SW480                 |                  | Upregulated   | 53 |
| Gastric cancer               |                  |                                   |                  |               |    |
|                              | hsa_circ_0010522 | Serum of Patients,SGC7901         | 3T3L1            | Upregulated   | 54 |
|                              | hsa_circ_0032683 | Serum of Patients                 | XGC-1            | Upregulated   | 55 |
|                              | circ-PVT1        | Serum of Patients                 | —                | Upregulated   | 56 |
|                              |                  | HGC-27/DDP,AGS/DDP                |                  |               |    |
|                              | circ-KIAA1244    | Serum of Patients                 | —                | Downregulated | 57 |
|                              | hsa_circ_0065149 | Serum of Patients                 | —                | Upregulated   | 58 |
|                              | circRNAs         | Serum of Patients                 | —                | —             | 59 |
|                              | circ-RanGAP1     | Serum of Patients                 | —                | Upregulated   | 60 |
|                              | circ_0000260     | Serum of Patients                 | —                | Upregulated   | 61 |
|                              | circ_0044366     | Serum of Patients                 | HUVECs           | Upregulated   | 62 |
|                              |                  | ov-circ29/si-circ29-SGC-7901      |                  |               |    |
|                              | circNHSL1        | Serum of Patients,HGC-27,AGS      | —                | Upregulated   | 63 |
| Bile Duct/gallbladder Cancer |                  |                                   |                  |               |    |
|                              | circ_0020256     | M2 macrophages,                   | HCCC-9810,RBE    | Upregulated   | 64 |
|                              | circRNAs         | Serum of Patients                 | —                | —             | 65 |
| Esophagus cancer             |                  |                                   |                  |               |    |
|                              | hsa-circ-0048117 | Serum of Patients,Eca-109         | M2 macrophage    | Upregulated   | 66 |
|                              | circ-SFMBT2      | KYSE150,TE1                       | GW4869           | Upregulated   | 67 |
| Pancreatic cancer            |                  |                                   |                  |               |    |
|                              | circZNF91        | hypoxia-BxPC-3,hypoxia-SW1990     | BxPC-3,SW1990    | Upregulated   | 68 |
|                              | circ-PDE8A       | Hs 766T,Hs 766T-L2                | BxPC-3,Capan-1   | Upregulated   | 69 |
| Nervous system malignancy    |                  |                                   |                  |               |    |
| Glioma                       |                  |                                   |                  |               |    |
|                              | circMMP1         | Serum of Patients                 | —                | Upregulated   | 70 |
|                              | circRNAs         | Serum of Patients                 | —                | —             | 71 |
|                              | hsa_circ_0042003 | Serum of Patients                 | —                | Upregulated   | 72 |

|                                |                        |                                                             |                      |               |    |
|--------------------------------|------------------------|-------------------------------------------------------------|----------------------|---------------|----|
|                                | circNEIL3              | Serum of Patients,U251,A172                                 | U251,A172            | Upregulated   | 73 |
|                                | hsa_circ_0002874       | U87,U251                                                    | —                    | Upregulated   | 74 |
|                                | circRNA_0001445        | A172,U373                                                   | A172,U373            | Upregulated   | 75 |
| Astrocytoma                    |                        |                                                             |                      |               |    |
|                                | circRNAs               | Serum of Patients                                           | —                    | —             | 76 |
| Lung cancer                    |                        |                                                             |                      |               |    |
|                                | circRNA_101093         | Serum of Patients,A549,H1299                                | A549,H1299           | Upregulated   | 77 |
|                                | circSATB2              | H1299                                                       | BEAS-2B,H460,A549    | Upregulated   | 78 |
|                                | circ_100395            | adipose-derived mesenchymal stem cell                       | H1650                | Downregulated | 79 |
|                                | circRNA_102481         | Serum of Patients,PC9/GR,HCC827/ER                          | PC9/GR,HCC827/ER     | Upregulated   | 80 |
|                                | circ_0076305           | Serum of Patients                                           | A549,H292            | Upregulated   | 81 |
|                                | circFBXW8              | A549,PC9                                                    | —                    | Upregulated   | 82 |
|                                | has-circRNA-002178     | Serum of Patients,PC9                                       | CD8+T cells          | Upregulated   | 84 |
|                                | circ_PIP5K1A           | Serum of Patients,A549,H1299                                | A549,H1299           | Upregulated   | 85 |
|                                | hsa_circ_0002130       | Serum of Patients                                           | —                    | Upregulated   | 86 |
|                                | hsa_circRNA_0056616    | Serum of Patients,PC9                                       | Serum of Patients    | Upregulated   | 87 |
|                                | hsa_circ_0069313       | Serum of Patients                                           | —                    | Upregulated   | 83 |
|                                | circSHKBP1             | Serum of Patients,A549,H1299                                | A549,H1299           | Upregulated   | 88 |
|                                | circFARSA              | A549,PC9                                                    | macrophages,A549,PC9 | Upregulated   | 89 |
|                                | circUSP7               | Serum of Patients,A549,H460                                 | CD8+T cells          | Upregulated   | 90 |
|                                | circRNAs               | Serum of Patients                                           | —                    | —             | 91 |
| Malignant Pleural Mesothelioma |                        |                                                             |                      |               |    |
|                                | circPLK1               | Serum of Patients                                           | —                    | Upregulated   | 92 |
| Ovarian cancer                 |                        |                                                             |                      |               |    |
|                                | Female malignant tumor |                                                             |                      |               |    |
|                                | circWHSC1              | ov-circWHSC1-HMrSV5                                         | CAOV3,OVCAR3         | Upregulated   | 93 |
|                                | circCdr1               | Serum of cisplatin_resistant ovarian patients               | —                    | Downregulated | 94 |
|                                | circ-0001068           | Serum of Patients,IOSE80,A2780                              | Jurkat T cells       | Upregulated   | 95 |
|                                | circRNAs               | Serum of Patients                                           | —                    | —             | 96 |
|                                | circFoxp1              | Serum of Patients                                           | COC1,SKOV3           | Upregulated   | 97 |
|                                | circPUM1               | ov-circPUM1-CAOV3                                           | HMrSV5               | Upregulated   | 98 |
| Breast cancer                  |                        |                                                             |                      |               |    |
|                                | circ_0032138           | Serum of Patients<br>hypoxic CAFs,CAF-circRNA control/N-Exo | MDA-MB-231,SKBR3     | Upregulated   | 99 |

|                                   |                                  |                                                     |                |                           |     |
|-----------------------------------|----------------------------------|-----------------------------------------------------|----------------|---------------------------|-----|
|                                   | circRNA-0005795, circRNA-0088088 | Serum of Patients                                   | —              | Upregulated/Downregulated | 100 |
|                                   | circPSMA1                        | Serum of Patients, MDA-MB-231, BT-549               | MDA-MB-231     | Upregulated               | 101 |
|                                   | circ-MMP11                       | Serum of Patients                                   |                | Upregulated               | 102 |
|                                   | circ_0001142                     | lapatinib resistance MDA-MB-231, MCF-7 MB231, MB453 | THP-1, BC      | Upregulated               | 103 |
|                                   | circCARM1                        | MDA-231                                             | MDA-231        | Upregulated               | 104 |
|                                   | circHIF1A                        | ov-circHIF1A/pLCDH-MDA-231                          | MDA-231        | Upregulated               | 105 |
| Head and neck malignancy          |                                  |                                                     |                |                           |     |
| Oral Squamous Cell Carcinoma      |                                  |                                                     |                |                           |     |
|                                   | circGDI2                         | CAL-27, SCC-15, ov-circGDI2-Donor                   | CAL-27, SCC-15 | Downregulated             | 106 |
|                                   | circ_0000199                     | Serum of Patients                                   | —              | Upregulated               | 107 |
|                                   | circSPATA6                       | ov-circSPATA6-CAL-27/HSC6                           | CAL-27, HSC6   | Downregulated             | 108 |
| Nasopharyngeal carcinoma          |                                  |                                                     |                |                           |     |
|                                   | circCUX1                         | Serum of Patients                                   | —              | Upregulated               | 109 |
|                                   | circMYC                          | Serum of Patients                                   | —              | Upregulated               | 110 |
| Laryngeal squamous cell carcinoma |                                  |                                                     |                |                           |     |
|                                   | circRASSF2                       | Serum of Patients                                   | —              | Upregulated               | 111 |
|                                   | circRNAs                         | Serum of Patients                                   | —              | —                         | 112 |
| Thyroid Carcinoma                 |                                  |                                                     |                |                           |     |
|                                   | circRNAs                         | Serum of Patients                                   | —              | —                         | 113 |
| Hematological malignancy          |                                  |                                                     |                |                           |     |
| Multiple myeloma                  |                                  |                                                     |                |                           |     |
|                                   | circRNAs                         | Serum of Patients                                   | —              | —                         | 114 |
|                                   | circ-ATP10A                      | Serum of Patients                                   | —              | Upregulated               | 115 |
|                                   | circMYC                          | Serum of Patients                                   | —              | Upregulated               | 116 |
| Chronic Lymphocytic Leukemia      |                                  |                                                     |                |                           |     |
|                                   | circ_0058493                     | K562, K562/G01                                      | —              | Upregulated               | 117 |
|                                   | circMC-COX2                      | Serum of Patients                                   | —              | Upregulated               | 118 |
| Urinary malignancy                |                                  |                                                     |                |                           |     |
| Bladder Carcinoma                 |                                  |                                                     |                |                           |     |
|                                   | circPRMT5                        | Serum of Patients                                   | —              | Upregulated               | 119 |
| Prostate Cancer                   |                                  |                                                     |                |                           |     |
|                                   | circXIAP                         | Docetaxel-resistance-DU145/PC3                      | —              | Upregulated               | 120 |
|                                   | circRNAs                         | —                                                   | —              | —                         | 121 |
|                                   | circRNA HIPK3                    | Serum of Patients                                   | 22Rv1, DU145   | Upregulated               | 122 |

|              |                                  |      |             |     |
|--------------|----------------------------------|------|-------------|-----|
| circ_0044516 | Exo-si/NC-circHIPK-3-22Rv1,DU145 | —    | Upregulated | 123 |
| Osteosarcoma | Serum of Patients,PC3,2B4,2RV1   | —    |             |     |
| circ_103801  | Serum of Patients,MG63,MG63/CDDP | MG63 | Upregulated | 124 |
| circRNAs     | HUVEC                            | —    | —           | 125 |

SupplementaryTable 2 Abbreviation and interpretation in this review

Abbreviation and interpretation

AA:arachidonic acid  
ABCC1:ATP binding cassette subfamily C member 1  
ABCG2:ATP binding cassette subfamily G member 2  
ATP:Adenosine triphosphate  
BAT:brown adipose tissue  
BC:breast cancer  
CCND2:cyclin D2  
CDDP:cisplatin  
CEA:carcinoembryonic antigen  
CEBPG:CCAAT enhancer binding protein gamma  
ceRNA:competing endogenous RNAs  
CML:chronic myelocytic leukemia  
CRC:colorectal cancer  
EC:esophageal cancer  
ECM:extracellular matrix  
eIF4A3:eukaryotic translation initiation factor 4A3  
EMT:epithelial-to-mesenchymal transition  
ENO1:enolase 1  
ENO2:enolase 2  
ER:estrogen receptor  
EWSR1 :EWS RNA binding protein 1  
FABP3:fatty acid binding protein 3  
FAS:fatty acid synthesis  
FAs:fatty acids  
FMNL3:formin like 3  
FOXM1:Forkhead box M1  
FUS:FUS RNA binding protein

GBM:glioblastoma multiforme  
GC:gastric cancer  
GEM:gemcitabine  
GLUTs:glucose transporters  
HCC:hepatocellular carcinoma  
HECTD4:HECT domain E3 ubiquitin protein ligase 4  
HIF-1 $\alpha$ :hypoxia inducible factor 1 subunit alpha  
HK:hexokinase  
HUVECs:human umbilical vein endothelial cells  
IGF2BP:insulin-like growth factor 2 mRNA-binding protein  
LDHA:lactate dehydrogenase  
LRP6:LDL receptor related protein 6  
LUAD:lung adenocarcinoma  
M1:M1 subphenotype macrophage  
M2:M2 subphenotype macrophage  
METTL3:methyltransferase 3  
MM:multiple myeloma  
MMP:matrix metalloproteinase  
MSI1:musashi RNA binding protein 1  
NANOG:Nanog homeobox  
NcRNAs:non-coding RNAs  
NEIL3:nei like DNA glycosylase 3  
NFIB:nuclear factor IB  
NLCSC:non-small cell lung cancer  
OC:ovarian cancer  
OCT4:also known as POU5F1:POU class 5 homeobox 1  
OSCC:squamous cell carcinoma  
OXPHOS:oxidative phosphorylation  
PC:pancreatic carcinoma  
PCA:pancreatic cancer  
PCa:prostatic cancer  
PD1:programmed cell death protein 1  
PD-L1:programmed cell death 1 ligand 1  
PFK:6-phosphofructa-1-kinase  
PFKFB2:6-phosphofructo-2-kinase/fructose-2,6-biphosphatase 2  
PKM:pyruvate kinase

PRDM16:PR/SET domain 16  
PRP19:pre-mRNA processing factor 19  
PTEN:phosphatase and tensin homolog  
RBP:RNA-binding proteins  
ROS:reactive oxygen species  
RT:radiation therapy  
SCAI:suppressor of cancer cell invasion  
SHP2:K-box region and MADS-box transcription factor family protein  
SIRT1:sirtuin 1  
SOX2:SOX-box transcription factor 2  
TFs:transcription factors  
TIM-3:also known as HAVCR2:hepatitis A virus cellular receptor 2  
TLR4:toll like receptor 4  
TME:tumor microenvironment  
TMZ:temozolomide  
USP7:ubiquitin specific peptidase 7  
VEGFA:vascular endothelial growth factor A  
WAT:white adipose tissue  
YBX1:Y-box binding protein 1

---
